# Supplementary material for: A Diverse Stochastic Search Algorithm for Combination Therapeutics
Source: Hindawi journal article supplement (doi:10.1155/2014/873436), 2014-01-01
Supplement: f1 [file 873436.f1.pdf]

# **A Diverse Stochastic Search Algorithm for Combination Therapeutics -Supplementary material**

Mehmet Umut Caglar<sup>1,2</sup> and Ranadip Pal<sup>2\*</sup>

<sup>1</sup> Department of Physics, Texas Tech University, Lubbock, TX, USA

<sup>2</sup> Department of Electrical and Computer Engineering, Texas Tech University, Lubbock, TX, USA

Email: Ranadip Pal - ranadip.pal@ttu.edu;

\*Corresponding author

## **Supplementary Material**

The supplementary materials include detailed tables of each computational experiment in order to find the optimized drug concentrations.

## Supplementary Tables

Table 1: Results for Synthetic Example 1 based on the 2D De Jong function (same distribution as example 2 in [1]). The explanation for the parameters is included in the methods section. The results show the effectiveness of our proposed approach as the average number of iterations required for our approach (cost) is 1/3rd of the ARU [1,2] approach.

| Name of the function                                                                         | De Jong                     |
|----------------------------------------------------------------------------------------------|-----------------------------|
| Dimension of the problem                                                                     | 2                           |
| Interval Min                                                                                 | [-2 -2]                     |
| Interval Max                                                                                 | [2 2]                       |
| Number of Grid Points                                                                        | [21 × 21]                   |
| Latin Hypercube Iterations                                                                   | 1000                        |
| Number of Iterations for surface estimation                                                  | 100                         |
| Probability of fast search                                                                   | 0.3                         |
| Power used for the inputs                                                                    | 1                           |
| Number of points to generate Gibbs sampling                                                  | 800                         |
| Number of Repeats                                                                            | 100                         |
| Number of Initial (Latin Hyper Cube) Numbers                                                 | 5                           |
| CLUSTERING RELATED PARAMETERS                                                                |                             |
| Cluster Threshold $\xi$                                                                      | 3                           |
| Cluster Break                                                                                | 10                          |
| Cluster Distance                                                                             | 0.447                       |
| equation used to simulate experimental results:<br>$z = (1 - x_1)^2 + 100 * (x_2 - x_1^2)^2$ |                             |
| Number of points with $\geq 0.95 \times \text{Max}_{\text{efficacy}}$                        | 2 (out of 21 <sup>2</sup> ) |
| <b>Proposed algorithm cost</b>                                                               | <b>15.96</b>                |
| <b>ARU algorithm [2] cost</b>                                                                | <b>46.20</b>                |
| Standard deviation in hundred runs of DSS                                                    | 7.99                        |
| Difference between means of ARU and DSS in terms of std of DSS                               | 3.79 $\sigma$               |
| Number of iterations in the worst case in DSS                                                | 5 + 43 = 48                 |
| Success Rate for proposed algorithm                                                          | 100%                        |
| Success Rate for ARU                                                                         | 99%                         |

Table 2: Results for Synthetic Example 2. The surface is described by a 3 dimensional response function  $z = x1^2 * (\sin(x2))^2 * (\cos(x3))^2$ . The average cost of our algorithm is 33% of the ARU algorithm, illustrating its effectiveness.

| name of the function                                                                        | f3a                |
|---------------------------------------------------------------------------------------------|--------------------|
| Dimension of the problem                                                                    | 3                  |
| Interval Min                                                                                | [-2.5 -2.5 -2.5]   |
| Interval Max                                                                                | [2.5 2.5 2.5]      |
| Number of Grid Points                                                                       | [11 × 11 × 11]     |
| Latin Hypercube Iterations                                                                  | 1000               |
| Number of Iterations for surface estimation                                                 | 100                |
| Probability of fast search                                                                  | 0.3                |
| Power used for the inputs                                                                   | 2                  |
| Number of points to generate Gibbs sampling                                                 | 15000              |
| Number of Repeats                                                                           | 100                |
| Number of Initial (Latin Hyper Cube) Numbers                                                | 10                 |
| CLUSTERING RELATED PARAMETERS                                                               |                    |
| Cluster Threshold $\xi$                                                                     | 5                  |
| Cluster Break                                                                               | 100                |
| Cluster Distance                                                                            | 1.26               |
| equation used to simulate experimental results:<br>$z = x1^2 * (\sin(x2))^2 * (\cos(x3))^2$ |                    |
| Number of points with $\geq 0.95 \times \text{Max}_{\text{efficiency}}$                     | 4 (out of $11^3$ ) |
| <b>Proposed algorithm cost</b>                                                              | <b>24.7</b>        |
| <b>ARU algorithm [2] cost</b>                                                               | <b>74.0</b>        |
| Standard deviation in hundred runs of DSS                                                   | 11.73              |
| Difference between means of ARU and DSS in terms of std of DSS                              | $4.20\sigma$       |
| Number of iterations in the worst case in DSS                                               | $10 + 62 = 72$     |
| Success Rate for proposed algorithm                                                         | 100%               |
| Success Rate for ARU                                                                        | 100%               |

Table 3: Results for Synthetic Example 3. The surface is described by the 3 dimensional response function  $z = x3 * peaks(x1, x2)$ ; where the peaks function is  $z = 3 * (1 - x1)^2 * exp(-(x1^2) - (x2 + 1)^2) - 10 * (x1/5 - x1^3 - x2^5) * exp(-x1^2 - x2^2) - 1/3 * exp(-(x1 + 1)^2 - x2^2)$  as defined in MATLAB. The average cost of our algorithm is 66.5% of the ARU algorithm, illustrating its effectiveness.

| name of the function                                                        | f3b                |
|-----------------------------------------------------------------------------|--------------------|
| Dimension of the problem                                                    | 3                  |
| Interval Min                                                                | [-3 -3 -3]         |
| Interval Max                                                                | [3 3 3]            |
| Number of Grid Points                                                       | [11 × 11 × 11]     |
| Latin Hypercube Iterations                                                  | 1000               |
| Number of Iterations for surface estimation                                 | 100                |
| Probability of doing fast search                                            | 0.3                |
| Power used for the inputs                                                   | 2                  |
| Number of points to generate Gibbs sampling                                 | 15000              |
| Number of Repeats                                                           | 100                |
| Number of Initial (Latin HyperCube) Numbers                                 | 10                 |
| CLUSTERING RELATED PARAMETERS                                               |                    |
| Cluster Threshold $\xi$                                                     | 5                  |
| Cluster Break                                                               | 100                |
| Cluster Distance                                                            | 1.2599             |
| equation used to simulate experimental results:<br>$z = x3 * peaks(x1, x2)$ |                    |
| Number of points with $\geq 0.95 \times \text{Max}_{efficiency}$            | 1 (out of $11^3$ ) |
| <b>Proposed algorithm cost</b>                                              | <b>52.7</b>        |
| <b>ARU algorithm [2] cost</b>                                               | <b>79.4</b>        |
| Standard deviation in hundred runs of DSS                                   | 32.20              |
| Difference between means of ARU and DSS in terms of std of DSS              | $0.82\sigma$       |
| Number of iterations in the worst case in DSS                               | $10 + 139 = 149$   |
| Success Rate for proposed algorithm                                         | 100%               |
| Success Rate for ARU                                                        | 100%               |

Table 4: Results for Synthetic Example 4. The surface is described by the 4 dimensional response function  $z = x1 * \exp(-(x1^2 + x2^2 + x3^2 + x4^2))$ . We run our simulation for two different number of Initial (Latin Hyper Cube) Numbers 40 & 10. The average cost of our algorithm is 47.7% and 37.1% of the ARU algorithm respectively, illustrating its effectiveness.

| name of the function                                                                             | f4a                                               |
|--------------------------------------------------------------------------------------------------|---------------------------------------------------|
| Dimension of the problem                                                                         | 4                                                 |
| Interval Min                                                                                     | [-2 -2 -3 -3]                                     |
| Interval Max                                                                                     | [2 2 3 3]                                         |
| Number of Grid Points                                                                            | [11 × 11 × 11 × 11]                               |
| Latin Hypercube Iterations                                                                       | 1000                                              |
| Number of Iterations for surface estimation                                                      | 100                                               |
| Probability of fast search                                                                       | 0.3                                               |
| Power used for the inputs                                                                        | 3                                                 |
| Number of points to generate Gibbs sampling                                                      | 15000                                             |
| Number of Repeats                                                                                | 100                                               |
| Number of Initial (Latin Hyper Cube) Numbers                                                     | 40 and 10 for two different tries                 |
| CLUSTERING RELATED PARAMETERS                                                                    |                                                   |
| Cluster Threshold $\xi$                                                                          | 7                                                 |
| Cluster Break                                                                                    | 100                                               |
| Cluster Distance                                                                                 | 2.1147                                            |
| equation used to simulate experimental results:<br>$z = x1 * \exp(-(x1^2 + x2^2 + x3^2 + x4^2))$ |                                                   |
| Number of points with $\geq 0.95 \times \text{Max}_{\text{efficacy}}$                            | 1 (out of $11^4$ )                                |
| <b>Proposed algorithm cost for run 1 and run 2</b>                                               | <b>65.3 and 50.72 respectively</b>                |
| <b>ARU algorithm [2] cost</b>                                                                    | <b>136.8</b>                                      |
| Standard deviation in hundred runs of DSS                                                        | 14.11 and 21.80 respectively                      |
| Difference between means of ARU and DSS in terms of std of DSS                                   | $5.07\sigma$ and $3.95\sigma$ respectively        |
| Number of iterations in the worst case in DSS                                                    | $40 + 66 = 106$ and $10 + 149 = 159$ respectively |
| Success Rate for proposed algorithm                                                              | 100%                                              |
| Success Rate for ARU                                                                             | 100%                                              |

Table 5: Results for Synthetic Example 5. The surface is described by the 4 dimensional response function  $z = \cos(03 * x1)^2 * \sin(03 * x2) * \tan(01 * x3) * x4$ . We run our simulation for two different number of Initial (Latin Hyper Cube) Numbers 40 & 10. The average cost of our algorithm is 57.5% and 30.9% of the ARU algorithm respectively, illustrating its effectiveness.

| name of the function                                                                                          | f4b                                            |
|---------------------------------------------------------------------------------------------------------------|------------------------------------------------|
| Dimension of the problem                                                                                      | 4                                              |
| Interval Min                                                                                                  | [-3 -3 -3 -3]                                  |
| Interval Max                                                                                                  | [3 3 3 3]                                      |
| Number of Grid Points                                                                                         | [11 × 11 × 11 × 11]                            |
| Latin Hypercube Iterations                                                                                    | 1000                                           |
| Number of Iterations for surface estimation                                                                   | 100                                            |
| Probability of doing fast search                                                                              | 0.3                                            |
| Power used for the inputs                                                                                     | 3                                              |
| Number of points to generate Gibbs sampling                                                                   | 15000                                          |
| Number of Repeats                                                                                             | 100                                            |
| Number of Initial (Latin Hyper Cube) Numbers                                                                  | 40 and 10 for two different tries              |
| CLUSTERING RELATED PARAMETERS                                                                                 |                                                |
| Cluster Threshold $\xi$                                                                                       | 7                                              |
| Cluster Break                                                                                                 | 100                                            |
| Cluster Distance                                                                                              | 2.1147                                         |
| equation used to simulate experimental results:<br>$z = \cos(03 * x1)^2 * \sin(03 * x2) * \tan(01 * x3) * x4$ |                                                |
| Number of points with $\geq 0.95 \times \text{Max}_{\text{efficacy}}$                                         | 12 (out of $11^4$ )                            |
| <b>Proposed algorithm cost</b>                                                                                | <b>52.7 and 28.29 respectively</b>             |
| <b>ARU algorithm [2] cost</b>                                                                                 | <b>91.6</b>                                    |
| Standard deviation in hundred runs of DSS                                                                     | 8.90 and 9.17 respectively                     |
| Difference between means of ARU and DSS in terms of std of DSS                                                | $4.42\sigma$ and $6.90\sigma$ respectively     |
| Number of iterations in the worst case in DSS                                                                 | $40 + 45 = 85$ and $10 + 47 + 57$ respectively |
| Success Rate for proposed algorithm                                                                           | 100%                                           |
| Success Rate for ARU                                                                                          | 100%                                           |

Table 6: Results for Synthetic Example 6. The surface is described by the 5 dimensional response function  $z = \exp(-x_1) * \cos(x_2)^2 * x_3^2 * (\exp(-(x_4 + 2)^2 - (x_5 + 3)^2) + \exp(-(x_4 - 2)^2 - (x_5 - 3)^2))$ . We run our simulation for two different number of Initial (Latin Hyper Cube) Numbers 40 & 10. The average cost of our algorithm is 98.4% and 76.7% of the ARU algorithm respectively, illustrating its effectiveness.

| name of the function                                                                                           | function f5a                                       |
|----------------------------------------------------------------------------------------------------------------|----------------------------------------------------|
| Dimension of the problem                                                                                       | 5                                                  |
| Interval Min                                                                                                   | [-2 -2 -4.5 -4.5 -4.5]                             |
| Interval Max                                                                                                   | [2 2 4.5 4.5 4.5]                                  |
| Number of Grid Points                                                                                          | [11 × 11 × 11 × 11 × 11]                           |
| latin Hypercube Iterations                                                                                     | 1000                                               |
| Number of Iterations for surface estimation                                                                    | 100                                                |
| Probability of doing fast search                                                                               | 3                                                  |
| Power used for the inputs                                                                                      | 4                                                  |
| Number of points to generate Gibbs sampling                                                                    | 15000                                              |
| Number of Repeats                                                                                              | 100                                                |
| Number of Initial (Latin HyperCube) Numbers                                                                    | 40 and 10 for two different tries                  |
| CLUSTERING RELATED PARAMETERS                                                                                  |                                                    |
| Cluster Threshold $\xi$                                                                                        | 7                                                  |
| Cluster Break                                                                                                  | 1000                                               |
| Cluster Distance                                                                                               | 2.8854                                             |
| equation used to simulate experimental results:                                                                |                                                    |
| $z = \exp(-x_1) * \cos(x_2)^2 * x_3^2 * (\exp(-(x_4 + 2)^2 - (x_5 + 3)^2) + \exp(-(x_4 - 2)^2 - (x_5 - 3)^2))$ |                                                    |
| Number of points with $\geq 0.95 \times \text{Max}_{\text{efficacy}}$                                          | 4 (out of $11^5$ )                                 |
| <b>Proposed algorithm cost</b>                                                                                 | <b>79.25 and 61.78 respectively</b>                |
| <b>ARU algorithm [2] cost</b>                                                                                  | <b>80.6</b>                                        |
| Standard deviation in hundred runs of DSS                                                                      | 23.25 and 27.58 respectively                       |
| Difference between means of ARU and DSS in terms of std of DSS                                                 | $0.06\sigma$ and $0.68\sigma$ respectively         |
| Number of iterations in the worst case in DSS                                                                  | $40 + 117 = 157$ and $10 + 166 = 176$ respectively |
| Success Rate for proposed algorithm                                                                            | 100%                                               |
| Success Rate for ARU                                                                                           | 100%                                               |



Table 7: Results for Synthetic Example 7. The surface is described by the 5 dimensional response function  $z = 1/2 * peaks(x1, x2) * cos(05 * x3) * sin(05 * x4) * (x5)^2$ ; where the peaks function is  $z = 3 * (1 - x1)^2 * exp(-(x1^2) - (x2 + 1)^2) - 10 * (x1/5 - x1^3 - x2^5) * exp(-x1^2 - x2^2) - 1/3 * exp(-(x1 + 1)^2 - x2^2)$  as defined in MATLAB. We run our simulation for two different number of Initial (Latin Hyper Cube) Numbers 40 & 10. The average cost of our algorithm is 73.5% and 89.6% of the ARU algorithm respectively, illustrating its effectiveness.

| name of the function                                                  | function 5b                                        |
|-----------------------------------------------------------------------|----------------------------------------------------|
| Dimension of the problem                                              | 5                                                  |
| Interval Min                                                          | [-3 -3 -3 -3 -3]                                   |
| Interval Max                                                          | [3 3 3 3 3]                                        |
| Number of Grid Points                                                 | [11 × 11 × 11 × 11 × 11]                           |
| Latin Hypercube Iterations                                            | 1000                                               |
| Number of Iterations for surface estimation                           | 100                                                |
| Probability of doing fast search                                      | 0.3                                                |
| Power used for the inputs                                             | 4                                                  |
| Number of points to generate Gibbs sampling                           | 15000                                              |
| Number of Repeats                                                     | 100                                                |
| Number of Initial (Latin Hyper Cube) Numbers                          | 40 and 10 for two different tries                  |
| <b>CLUSTERING RELATED PARAMETERS</b>                                  |                                                    |
| Cluster Threshold $\xi$                                               | 7                                                  |
| Cluster Break                                                         | 1000                                               |
| Cluster Distance                                                      | 2.8854                                             |
| equation used to simulate experimental results:                       |                                                    |
| $z = 1/2 * peaks(x1, x2) * cos(05 * x3) * sin(05 * x4) * (x5)^2$      |                                                    |
| Number of points above .95 success rate (after normalization)         | 8 (out of $11^5$ )                                 |
| Number of points with $\geq 0.95 \times \text{Max}_{\text{efficacy}}$ | 8 (out of $11^5$ )                                 |
| <b>Proposed algorithm cost</b>                                        | <b>159.47 and 194.15 respectively</b>              |
| <b>ARU algorithm [2] cost</b>                                         | <b>216.8</b>                                       |
| Standard deviation in hundred runs of DSS                             | 90.51 and 150.15 respectively                      |
| Difference between means of ARU and DSS in terms of std of DSS        | $0.63\sigma$ and $0.15\sigma$ respectively         |
| Number of iterations in the worst case in DSS                         | $40 + 362 = 402$ and $10 + 637 = 647$ respectively |
| Success Rate for proposed algorithm                                   | 100%                                               |
| Success Rate for ARU                                                  | 100%                                               |

Table 8: Results for Biological Example 1 related to normalized bacterial (*S. aureus*) inhibition (2D) response described in [3]. The combination drugs considered are Trimethoprim and Sulfamethoxazole. The average cost of our algorithm is 42% of the ARU algorithm illustrating its effectiveness.

| Source of data set                                                    | Bacterial inhibition [3]                              |
|-----------------------------------------------------------------------|-------------------------------------------------------|
| Dimension of the problem                                              | 2                                                     |
| Name of the drugs                                                     | [Trimethoprim, Sulfamethoxazole]                      |
| Trimethoprim intervals                                                | [0, 0.08, 0.16, 0.32, 0.63, 1.25, 2.5, 5, 10] $\mu M$ |
| Sulfamethoxazole intervals                                            | [0, 0.31, 0.62, 1.25, 2.5, 5, 10, 20, 40] $\mu M$     |
| Number of Grid Points                                                 | [9 $\times$ 9]                                        |
| Latin Hypercube Iterations                                            | 1000                                                  |
| Number of Iterations for surface estimation                           | 100                                                   |
| Probability of fast search                                            | 0.3                                                   |
| Power used for the inputs                                             | 1                                                     |
| Number of points to generate Gibbs sampling                           | 200                                                   |
| Number of Repeats                                                     | 100                                                   |
| Number of Initial (Latin Hyper Cube) Numbers                          | 3                                                     |
| CLUSTERING RELATED PARAMETERS                                         |                                                       |
| Cluster Threshold $\xi$                                               | 3                                                     |
| Cluster Break                                                         | 10                                                    |
| Cluster Distance                                                      | 0.44721                                               |
| Number of points with $\geq 0.95 \times \text{Max}_{\text{efficacy}}$ | 34 (out of $9^2$ )                                    |
| <b>Proposed algorithm cost</b>                                        | <b>1.85</b>                                           |
| <b>ARU algorithm [2] cost</b>                                         | <b>4.50</b>                                           |
| Standard deviation in hundred runs of DSS                             | 0.78                                                  |
| Difference between means of ARU and DSS in terms of std of DSS        | $3.77\sigma$                                          |
| Number of iterations in the worst case in DSS                         | $3 + 0 = 3$                                           |
| Success Rate for proposed algorithm                                   | 100%                                                  |
| Success Rate for ARU                                                  | 100%                                                  |

Table 9: Results for Biological Example 2 related to normalized lung cancer inhibition response (2D) described in [4]. The combination drugs considered are Pentamidine and Chlorpromazine. The average cost of our algorithm is 48% of the ARU algorithm, illustrating its effectiveness. The success percentage for our algorithm is 100% whereas ARU has a success rate of 98%.

| Source of the data                                                    | Lung Cancer Response [4]                            |
|-----------------------------------------------------------------------|-----------------------------------------------------|
| Dimension of the problem                                              | 2                                                   |
| Name of the drugs                                                     | [Pentamidine Chlorpromazine]                        |
| Pentamidine intervals                                                 | [0, 0.25, 0.4, 0.6, 0.8, 1, 1.5, 2, 4, 6.8] $\mu M$ |
| Chlorpromazine intervals                                              | [0, 1, 2, 4, 6, 8, 12, 16, 20, 22] $\mu M$          |
| Number of Grid Points                                                 | [10 $\times$ 10]                                    |
| Latin Hypercube Iterations                                            | 1000                                                |
| Number of Iterations for surface estimation                           | 100                                                 |
| Probability of fast search                                            | 0.3                                                 |
| Power used for the inputs                                             | 1                                                   |
| Number of points to generate Gibbs sampling                           | 100                                                 |
| Number of Repeats                                                     | 100                                                 |
| Number of Initial (Latin Hyper Cube) Numbers                          | 3                                                   |
| CLUSTERING RELATED PARAMETERS                                         |                                                     |
| Cluster Threshold $\xi$                                               | 3                                                   |
| Cluster Break                                                         | 10                                                  |
| Cluster Distance                                                      | 0.447                                               |
| Number of points with $\geq 0.95 \times \text{Max}_{\text{efficacy}}$ | 7 (out of $10^2$ )                                  |
| <b>Proposed algorithm cost</b>                                        | <b>5.97</b>                                         |
| <b>ARU algorithm [2] cost</b>                                         | <b>12.40</b>                                        |
| Standard deviation in hundred runs of DSS                             | 4.74                                                |
| Difference between means of ARU and DSS in terms of std of DSS        | $1.36\sigma$                                        |
| Number of iterations in the worst case in DSS                         | $3 + 20 = 23$                                       |
| Success Rate for proposed algorithm                                   | 100%                                                |
| Success Rate for ARU                                                  | 98%                                                 |

Table 10: Bacterial infection data set from [3] Figure 3a

|                                                    |                                                |      |      |      |      |      |      |      |      |       |
|----------------------------------------------------|------------------------------------------------|------|------|------|------|------|------|------|------|-------|
| <b>Sulfamethoxazole (<math>\mu\text{M}</math>)</b> | 40.00                                          | 60   | 91   | 90   | 94   | 92   | 94   | 92   | 96   | 94    |
|                                                    | 20.00                                          | 27   | 91   | 90   | 94   | 92   | 94   | 93   | 96   | 93    |
|                                                    | 10.00                                          | 12   | 84   | 88   | 94   | 92   | 95   | 93   | 96   | 95    |
|                                                    | 5.00                                           | 8.4  | 69   | 84   | 92   | 91   | 94   | 92   | 95   | 94    |
|                                                    | 2.50                                           | 5    | 44   | 75   | 78   | 89   | 92   | 91   | 93   | 92    |
|                                                    | 1.25                                           | 1.7  | 11   | 60   | 78   | 81   | 93   | 89   | 94   | 91    |
|                                                    | 0.62                                           | 1.8  | 7.9  | 17   | 42   | 64   | 88   | 92   | 96   | 94    |
|                                                    | 0.31                                           | 1.1  | -0.4 | 8.7  | 21   | 39   | 77   | 91   | 96   | 95    |
|                                                    | 0.00                                           | 6.8  | -1.7 | 5.4  | 6.4  | 31   | 44   | 73   | 88   | 94    |
|                                                    |                                                | 0.00 | 0.08 | 0.16 | 0.32 | 0.63 | 1.25 | 2.50 | 5.00 | 10.00 |
|                                                    | <b>Trimethoprim (<math>\mu\text{M}</math>)</b> |      |      |      |      |      |      |      |      |       |

Table 11: lung cancer inhibition response data set from [4] figure 4a

|                                                  |                                               |      |      |      |      |      |      |      |      |      |    |
|--------------------------------------------------|-----------------------------------------------|------|------|------|------|------|------|------|------|------|----|
| <b>Chlorpromazine (<math>\mu\text{M}</math>)</b> | 22.00                                         | 71   | 63   | 71   | 68   | 78   | 75   | 80   | 78   | 82   | 77 |
|                                                  | 20.00                                         | 67   | 63   | 69   | 66   | 79   | 75   | 81   | 78   | 83   | 80 |
|                                                  | 16.00                                         | 57   | 56   | 62   | 57   | 69   | 66   | 74   | 77   | 80   | 74 |
|                                                  | 12.00                                         | 36   | 44   | 57   | 51   | 66   | 62   | 72   | 74   | 75   | 75 |
|                                                  | 8.00                                          | 21   | 29   | 40   | 36   | 42   | 37   | 53   | 62   | 71   | 68 |
|                                                  | 6.00                                          | 9    | 14   | 31   | 26   | 32   | 39   | 52   | 55   | 66   | 71 |
|                                                  | 4.00                                          | -12  | 10   | 5    | 14   | 24   | 25   | 35   | 30   | 59   | 68 |
|                                                  | 2.00                                          | -3   | -4   | 15   | 5    | 22   | 19   | 29   | 44   | 59   | 59 |
|                                                  | 1.00                                          | -12  | -11  | -4   | 0    | 9    | 0    | 21   | 33   | 56   | 64 |
|                                                  | 0.00                                          | -3   | -9   | 9    | -1   | 1    | -3   | 18   | 41   | 56   | 59 |
|                                                  | 0.00                                          | 0.25 | 0.40 | 0.60 | 0.80 | 1.00 | 1.50 | 2.00 | 4.00 | 6.80 |    |
|                                                  | <b>Pentamidine (<math>\mu\text{M}</math>)</b> |      |      |      |      |      |      |      |      |      |    |

## References

1. Yoon BJ: **Enhanced stochastic optimization algorithm for finding effective multi-target therapeutics.** *BMC Bioinformatics* 2011, **12**(Suppl 1):S18+.
2. Kim M, Yoon BJ: **Adaptive reference update (ARU) algorithm. A stochastic search algorithm for efficient optimization of multi-drug cocktails.** *BMC Genomics* 2012, **13**(Suppl 6):S12.
3. Zimmermann GR, Lehár J, Keith CT: **Multi-target therapeutics: when the whole is greater than the sum of the parts.** *Drug discovery today* 2007, **12**(1-2):34-42.
4. Borisy AA, Elliott PJ, Hurst NW, Lee MS, Lehár J, Price ER, Serbedzija G, Zimmermann GR, Foley MA, Stockwell BR, et al.: **Systematic discovery of multicomponent therapeutics.** *Proceedings of the National Academy of Sciences* 2003, **100**(13):7977-7982.
